# Supplementary material
Source: Springer Nature journal article supplement (https://www.springermedizin.de/resource/supplementary/12885_2011_3151_MOESM4_ESM.pdf/9464250)
Supplement: MOESM4 [file 9464250]

A

Note:  
Points towards higher hazard

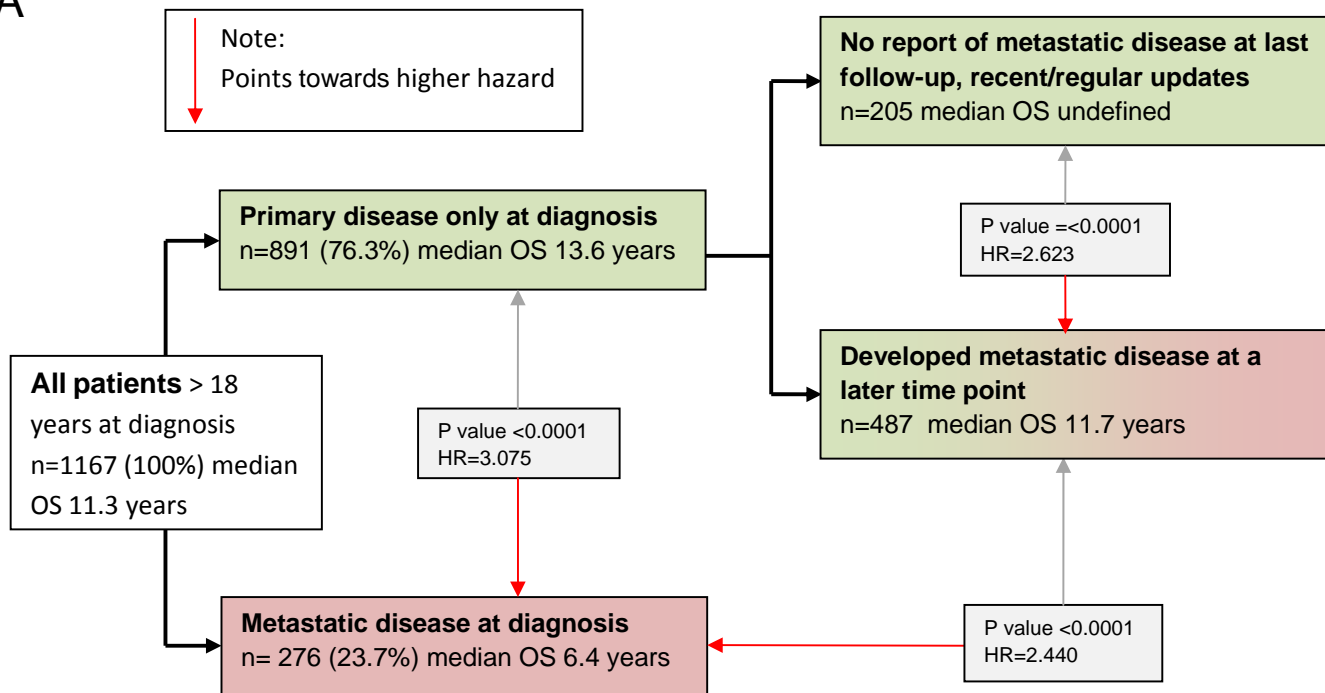

B

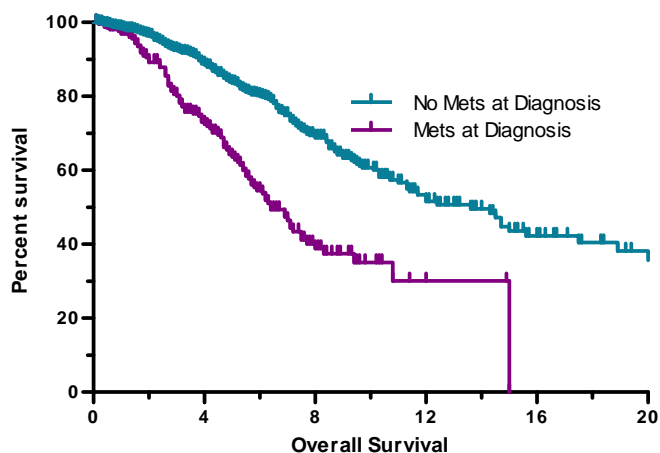

|                                              | Median OS  |
|----------------------------------------------|------------|
| Metastatic disease at diagnosis*<br>(n= 276) | 6.4 years  |
| Primary disease only at<br>diagnosis (n=891) | 13.6 years |
| P value                                      | <0.0001    |
| Hazard Ratio                                 | 3.075      |

\*This group represents an easily defined group that is most similar to published results for metastatic imatinib trials. Patients less than 18 years old at diagnosis were excluded.

C

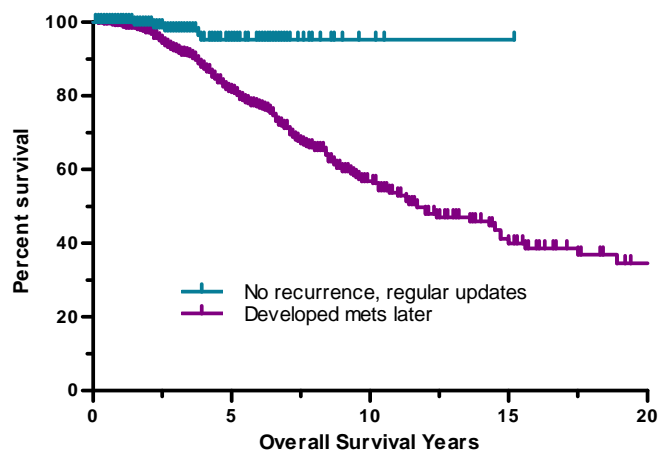

|                                           | Median OS  |
|-------------------------------------------|------------|
| Later had a recurrence*<br>(n= 487)       | 11.7 years |
| No recurrence, regular<br>updates (n=205) | Undefined  |
| P value                                   | <0.0001    |
| Hazard Ratio                              | 2.623      |

Both groups exclude patients diagnosed below the age of 18.  
\*This group presented with primary disease only and later had a recurrence.
